# Supplementary material for: Highly transparent, low-haze, hybrid cellulose nanopaper as electrodes for flexible electronics
Source: Royal Society of Chemistry journal article supplement (doi:10.1039/c6nr02245f), 2016-01-01
Supplement: c6nr02245f1.pdf [file c6nr02245f1.pdf]

## SUPPORTING INFORMATION

### **HIGHLY TRANSPARENT, LOW-HAZE, HYBRID CELLULOSE NANOPAPER AS ELECTRODES FOR FLEXIBLE ELECTRONICS**

Xuezhu Xu <sup>a,b,c</sup>, Jian Zhou <sup>c</sup>, Long Jiang <sup>a,b\*</sup>, Gilles Lubineau <sup>c,\*</sup>, Tienkhee Ng <sup>d</sup>, Boon S. Ooi <sup>d</sup>, Hsien-Yu Liao <sup>d</sup>, Chao Shen <sup>d</sup>, Long Chen <sup>e</sup>, J. Y. Zhu <sup>f</sup>

<sup>a</sup> North Dakota State University, Department of Mechanical Engineering, <sup>b</sup> Program of Materials and Nanotechnology, Fargo, ND 58102, United States

<sup>c</sup> King Abdullah University of Science and Technology (KAUST), Physical Science and Engineering Division, Mechanical Engineering, COHMAS Laboratory, Thuwal 23955-6900, Saudi Arabia

<sup>d</sup> King Abdullah University of Science and Technology (KAUST), Physical Science and Engineering Division, Electrical Engineering, Photonics Laboratory, Thuwal 23955-6900, Saudi Arabia

<sup>e</sup> King Abdullah University of Science and Technology (KAUST), Advanced Nanofabrication, Imaging and Characterization Core Laboratory, Thuwal 23955-6900, Saudi Arabia

<sup>f</sup> Forest Products Laboratory, USDA Forest Service, Madison, Wisconsin 53726, United States

Corresponding authors: Prof. Long Jiang ([long.jiang@ndsu.edu](mailto:long.jiang@ndsu.edu)); Prof. Gilles Lubineau ([gilles.lubineau@kaust.edu.sa](mailto:gilles.lubineau@kaust.edu.sa)).

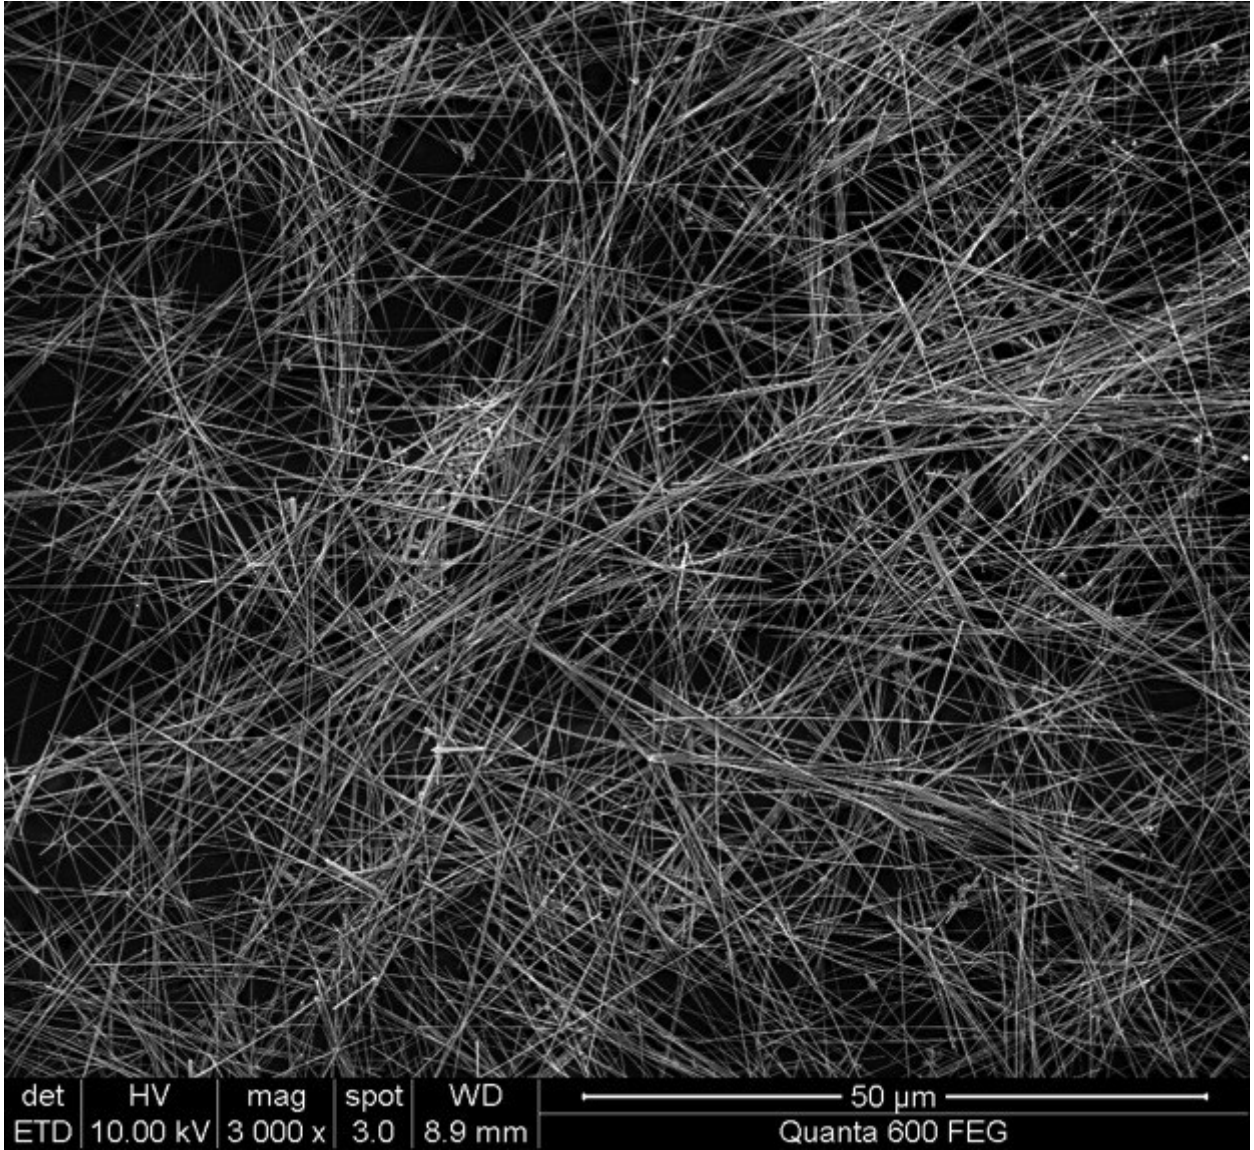

**Figure S1.** SEM image of synthesized silver nanowires.

**Table S1.** Haze values of a variety of plastics.<sup>61-69</sup>

| Plastic type    | Haze (%) |
|-----------------|----------|
| PET             | 3        |
| PC              | 5.2      |
| PE              | 7.5      |
| PU              | 18.1     |
| PVC             | 12       |
| PP              | 4        |
| PS              | 25       |
| PMMA            | 10       |
| silicone rubber | 3        |
